# Supplementary material for: Alveolar macrophage secretion of vesicular SOCS3 represents a platform for lung cancer therapeutics
Source: JCI journal article supplement (doi:10.1172/jci.insight.131340), 2019-10-16
Supplement: sd1 [file 1]

Supplemental Table 1. qRT-PCR primer sequences.

| Gene             | Forward sequence (5'-3') | Reverse sequence (5'-3')  |
|------------------|--------------------------|---------------------------|
| <i>KRAS</i> G12V | AAACTTGTGGTAGTTGGAGCAGT  | CATATTCGTCCACAAAATGATTCTG |
| FoxM1            | GCAGGCTGCACTATCAACAA     | TCGAAGGCTCCTCAACCTTA      |
| FasR             | CGGACCCAGAATACCAAGTG     | TGGTGAGTGTGCATTCCTTG      |
| iNOS             | ACCACTCGTACTTGGGATGC     | CACCTTGGAGTTCACCCAGT      |
| IL-12            | ATCCAGCGCAAGAAAGAAAA     | AATAGCGATCCTGAGCTTGC      |
| TGFβ             | GGAGAGCCCTGGATACCAAC     | ATCCACTTCCAACCCAGGTC      |
| IL-10            | TGAATTCCCTGGGTGAGAAG     | TCATGGCCTTGTAGACACCTT     |
| β-actin          | GACGGCCAGGTCATCACTAT     | GCACTGTGTTGGCATAGAGG      |

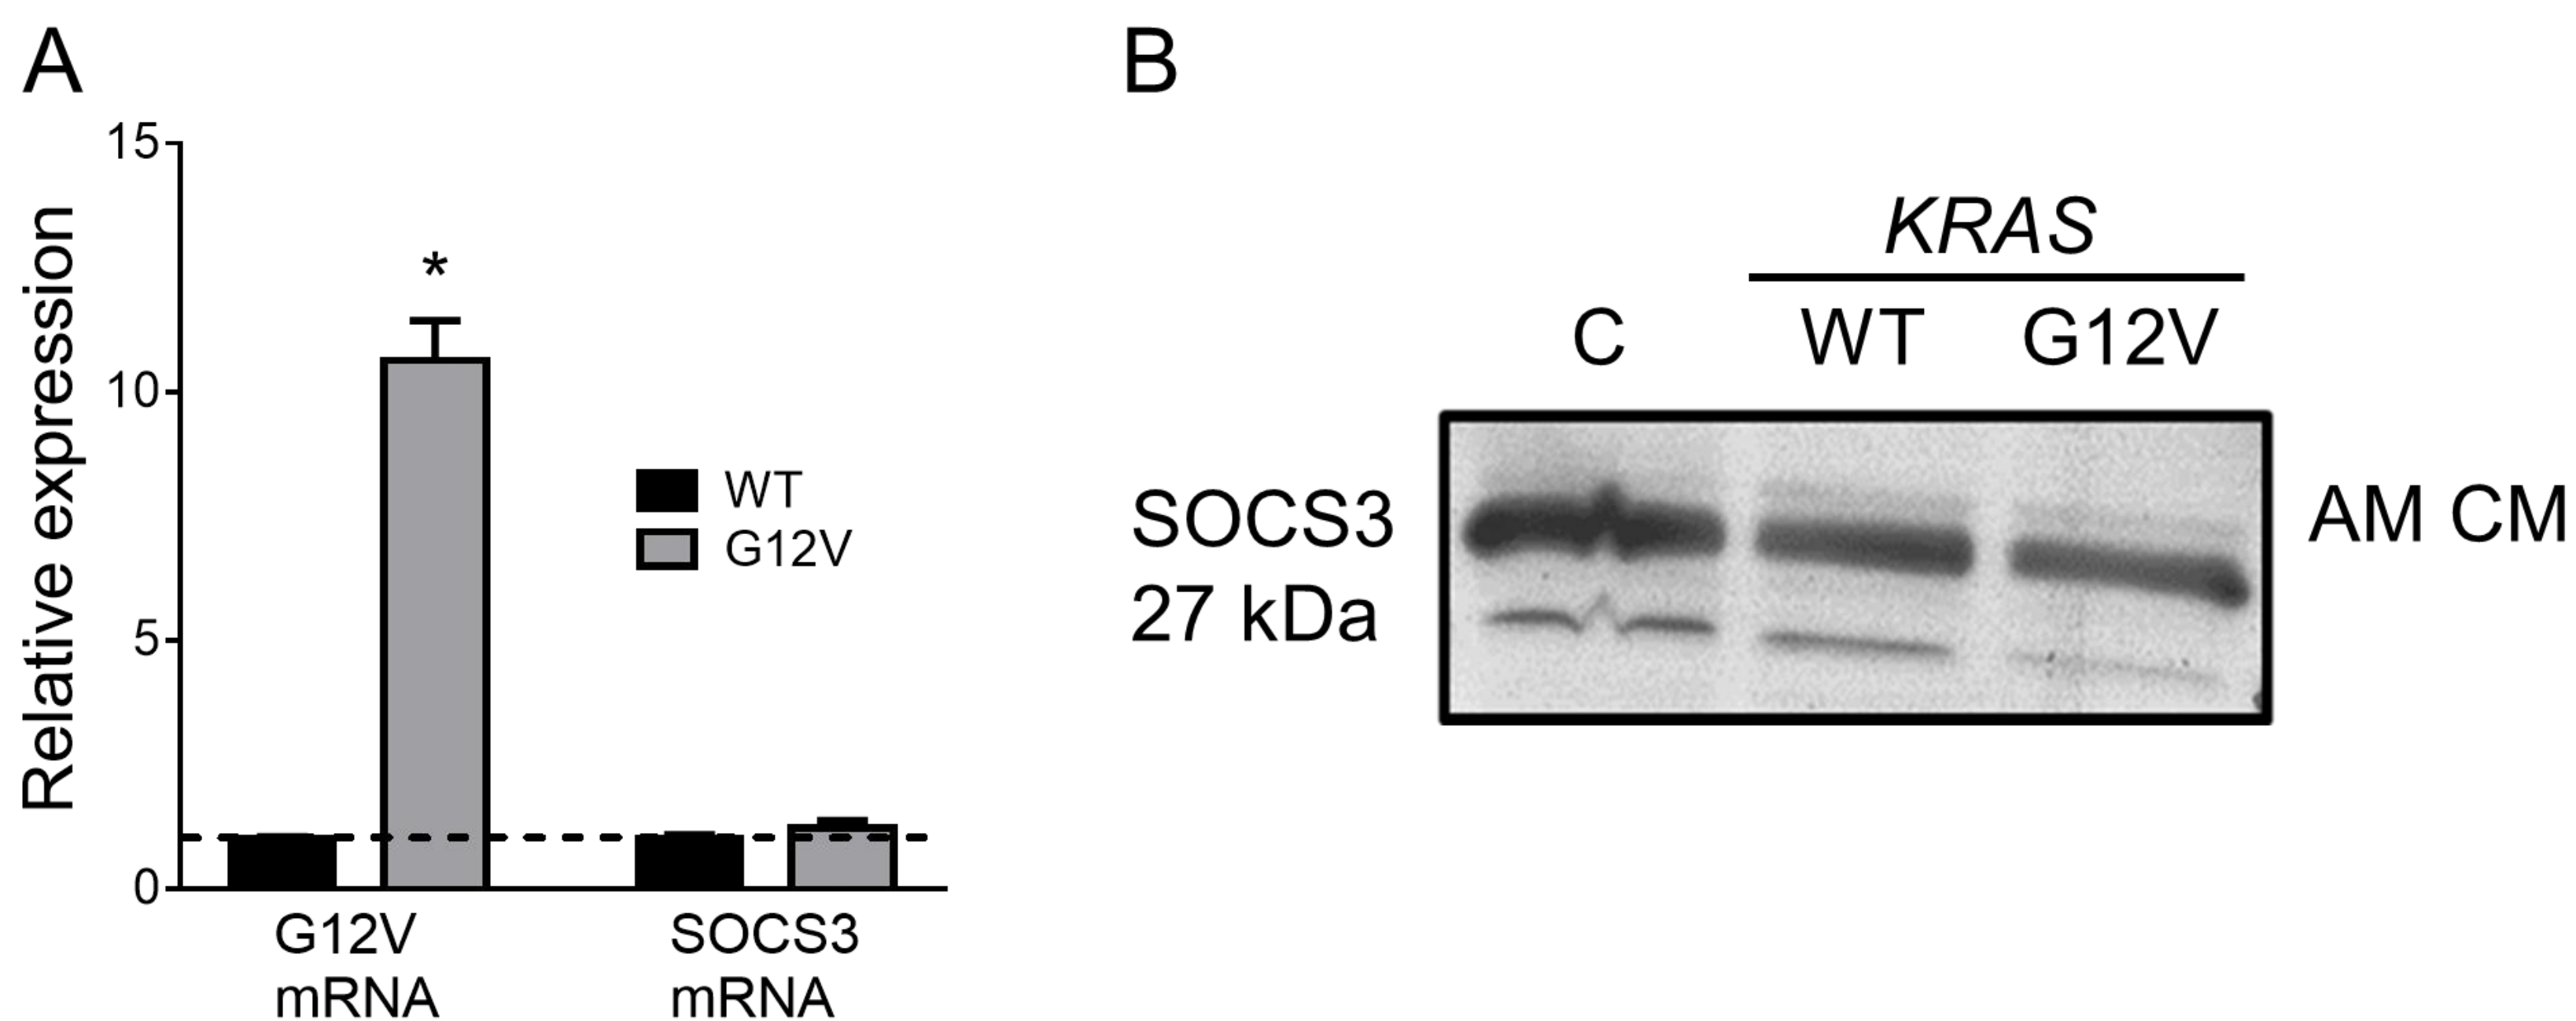

**Supplemental Figure S1. Induced expression of mutant *KRAS* has no effect on AM SOCS3 expression or secretion.**

(A)  $1 \times 10^6$  primary rat AMs/well of a 6-well tissue culture plate were transduced with pBABE-puro-*KRAS* (WT) or pBABE-puro-*KRAS* G12V (mutant) lentiviral vectors for 24 h. Mutant *KRAS* and SOCS3 mRNA expression were determined by qRT-PCR.  $n = 3$  separate experiments, student's t-test was used to compare 2 groups;  $*p < 0.05$ . (B) SOCS3 protein levels were assessed in the CM of naïve, WT and *KRAS* G12V-transduced AMs after 2 weeks of culture by WB. Blot is representative of 3 separate experiments.

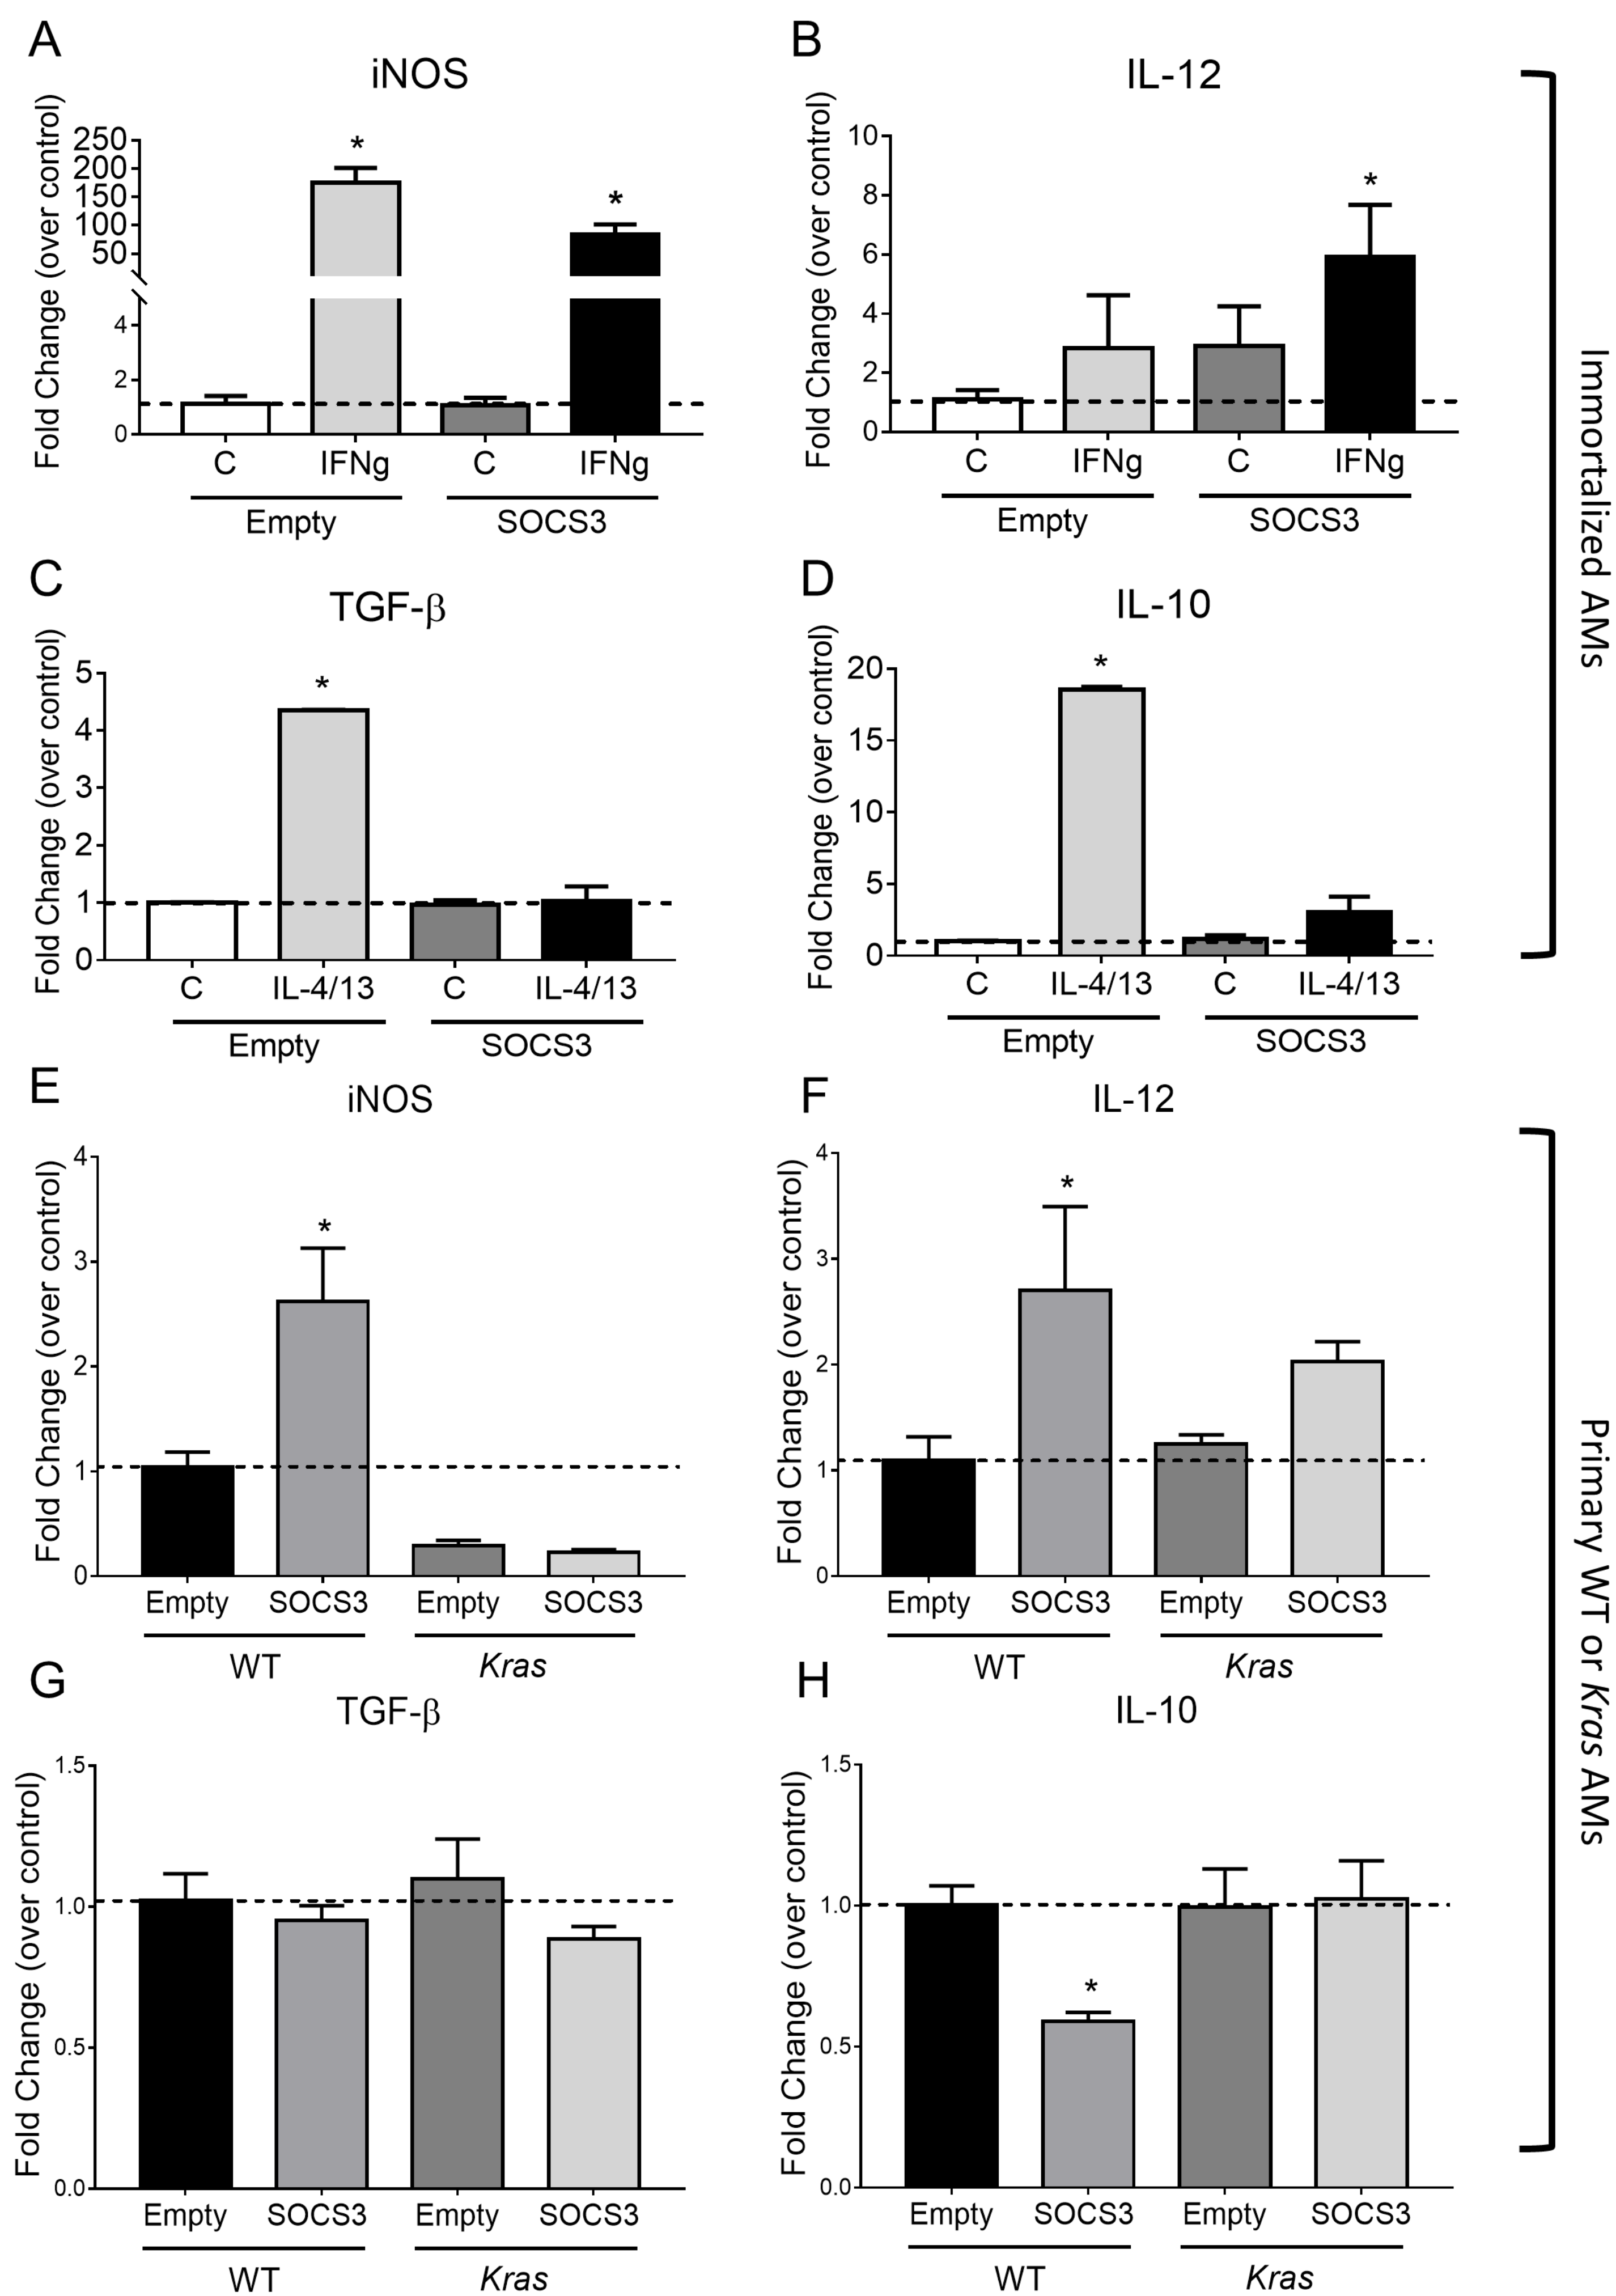

## Supplemental Figure S2. SOCS3 liposomes fail to potentiate M2-associated gene expression in AMs

(A-D)  $1 \times 10^6$  immortalized AMs were cultured with empty or SOCS3 liposomes in the presence or absence of IFN $\gamma$  or IL-4/13 for 24 h. Relative iNOS, IL-12, TGF- $\beta$  and IL-10 mRNA expression were determined by qRT-PCR.  $n = 3$  separate experiments. One-way ANOVA was used to compare multiple groups; \* $p < 0.05$ . (E-H)  $1 \times 10^6$  AMs isolated at 16 weeks post-SPC-adenoviral Cre infection from WT or mutant *Kras* mice were cultured with empty or SOCS3 liposomes for 24 h. Relative iNOS, IL-12, TGF- $\beta$  or IL-10 mRNA expression were determined by qRT-PCR.  $n = 3$  separate experiments. One-way ANOVA was used to compare multiple groups; \* $p < 0.05$ .
